# Supplementary material for: Growth and Decay of Fecal Indicator Bacteria and Changes in the Coliform Composition on the Top Surface Sand of Coastal Beaches during the Rainy Season
Source: MDPI journal article supplement (doi:10.3390/microorganisms11041074), 2023-04-20
Supplement: s1 [file s1]

## Supplementary Figure and Table

# Growth and decay of fecal indicator bacteria and changes in the coliform composition on the top surface sand of coastal beaches during the rainy season

Soichiro Tamai, Hiroshi Shimamoto, Kei Nukazawa, Yoshihiro Suzuki\*

Department of Civil and Environmental Engineering, Faculty of Engineering, University of Miyazaki,

Miyazaki 889-2192, Japan; hh17057@student.miyazaki-u.ac.jp (S.T.); shimamo-to@cc.miyazaki-u.ac.jp (H.S.);

nukazawa.kei.b3@cc.miyazaki-u.ac.jp (K.N.)

\*Correspondence: ysuzuki@cc.miyazaki-u.ac.jp; Tel.: +81-985-58-7339

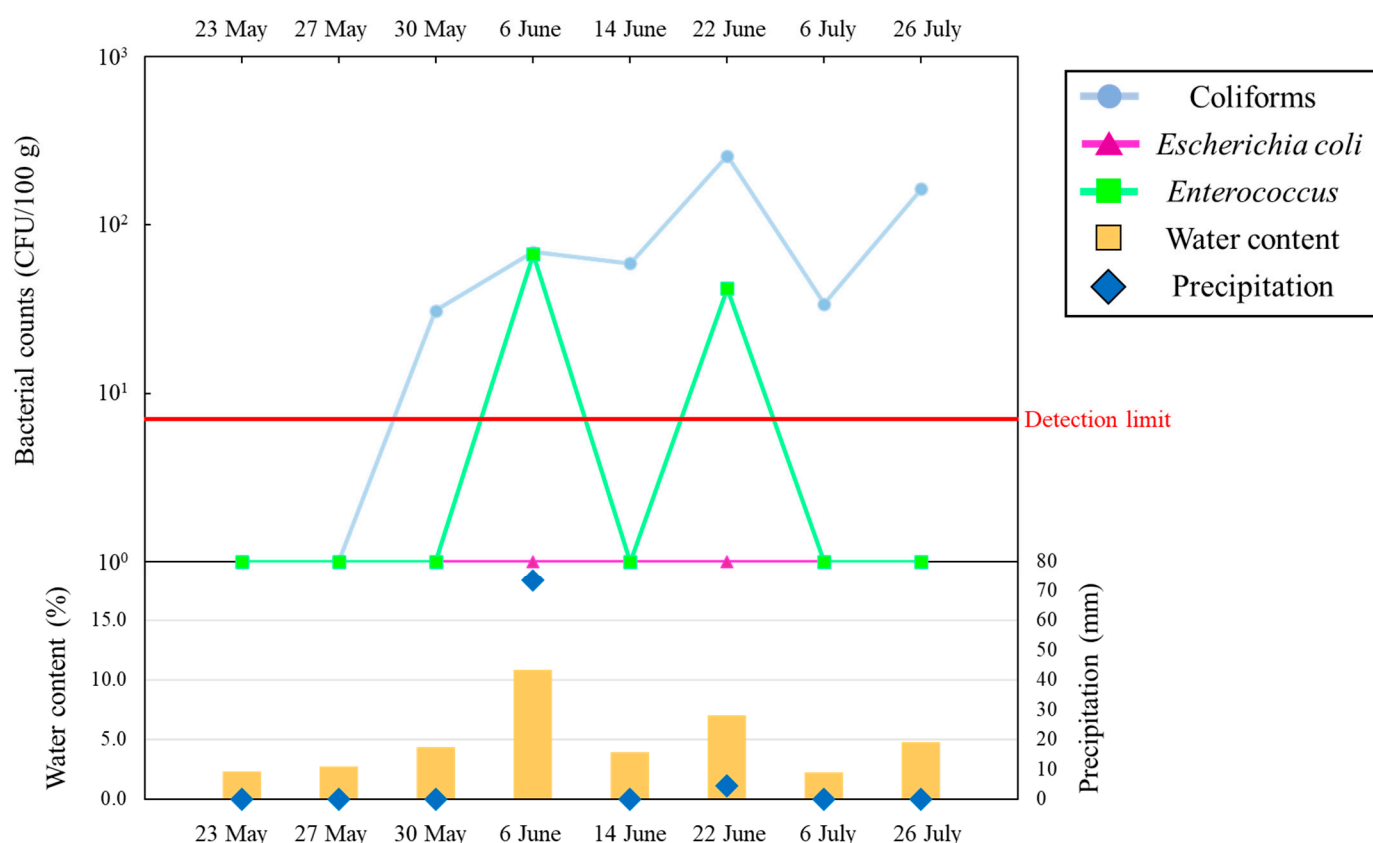

Figure S1. Variation of *Escherichia coli*, coliform, and *Enterococcus* counts in supratidal 10 cm sand; water content; and precipitation at Kizaki Beach.

## Supplementary Figure and Table

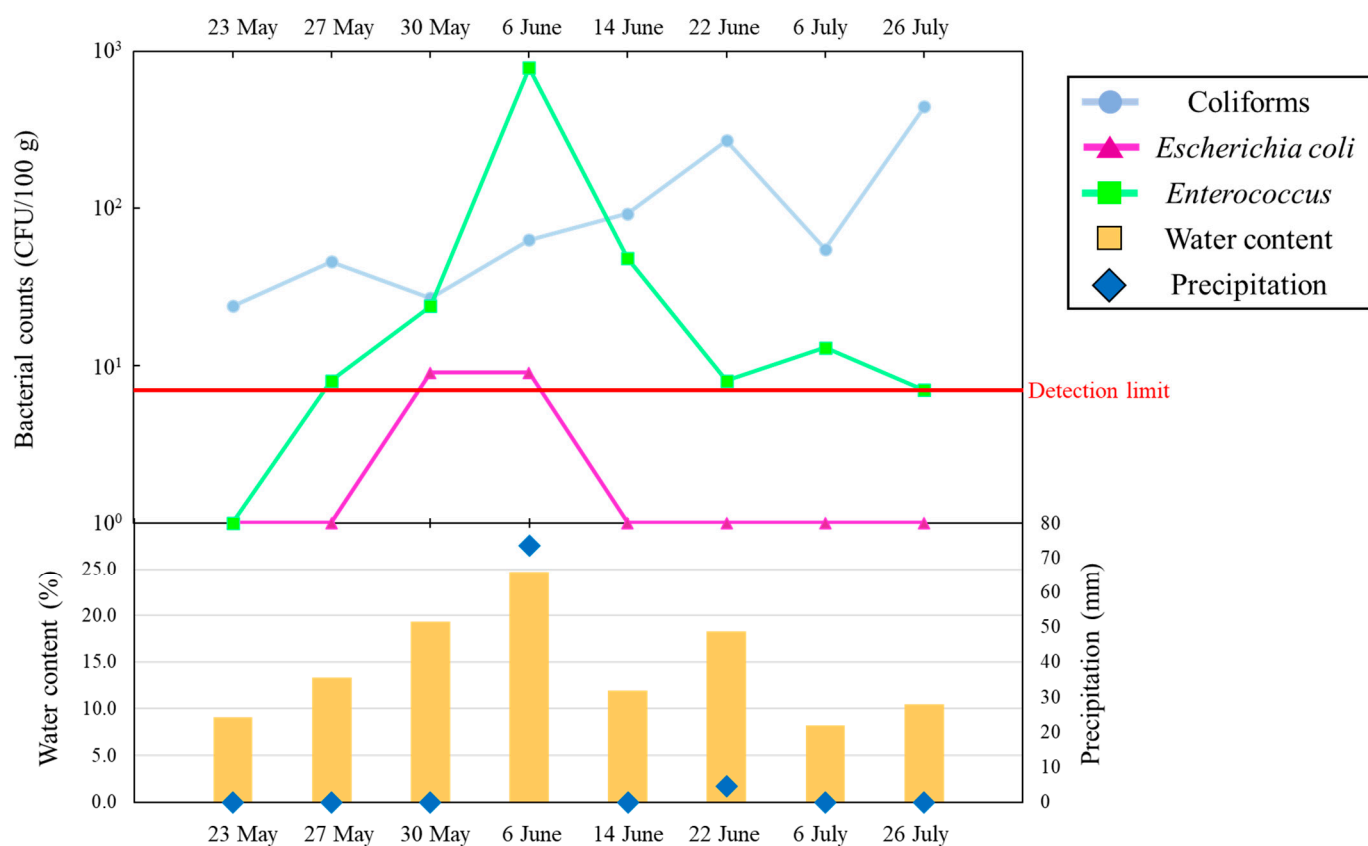

Figure S2. Variation of *Escherichia coli*, coliform, and *Enterococcus* counts in supratidal 10 cm sand; water content; and precipitation at Shirahama Beach.

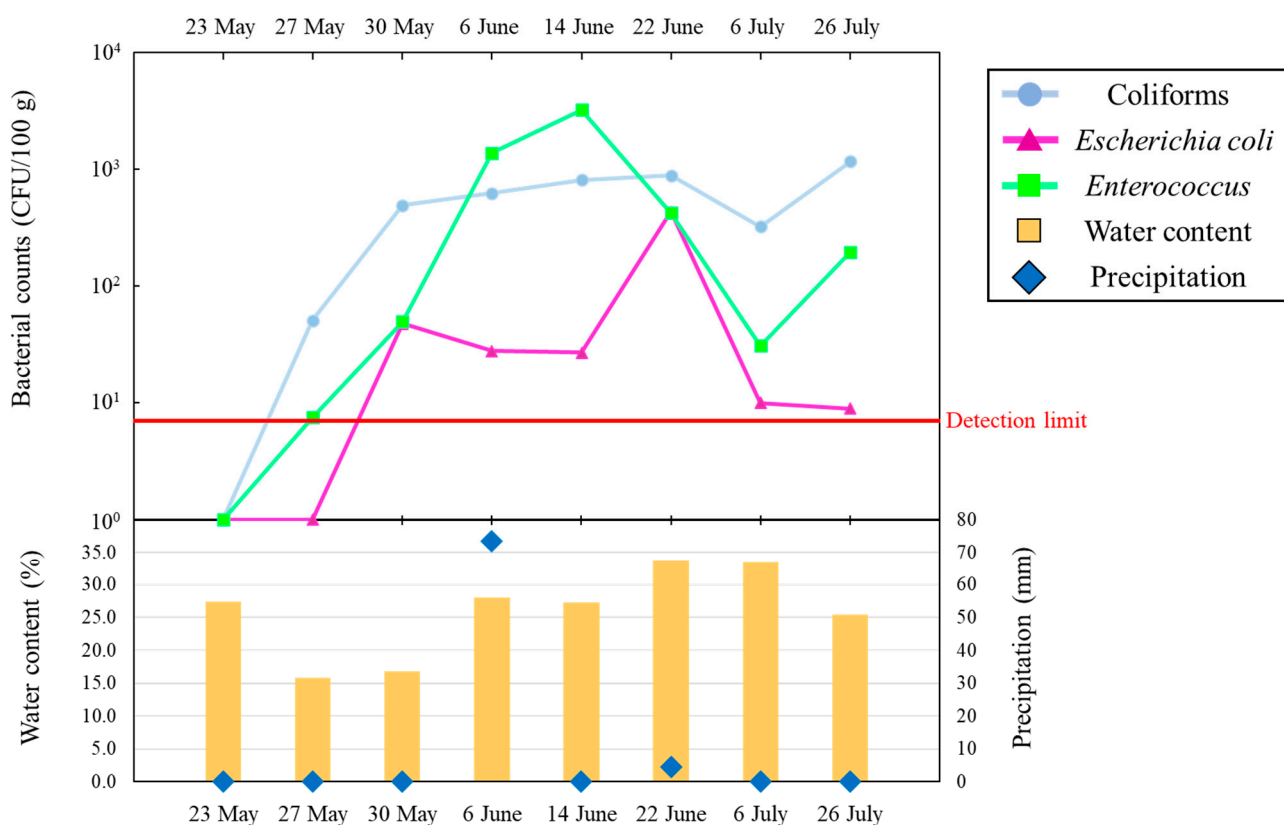

Figure S3. Variation of *Escherichia coli*, coliform, and *Enterococcus* counts in intertidal 10 cm sand; water content; and precipitation at Kizaki Beach.

## Supplementary Figure and Table

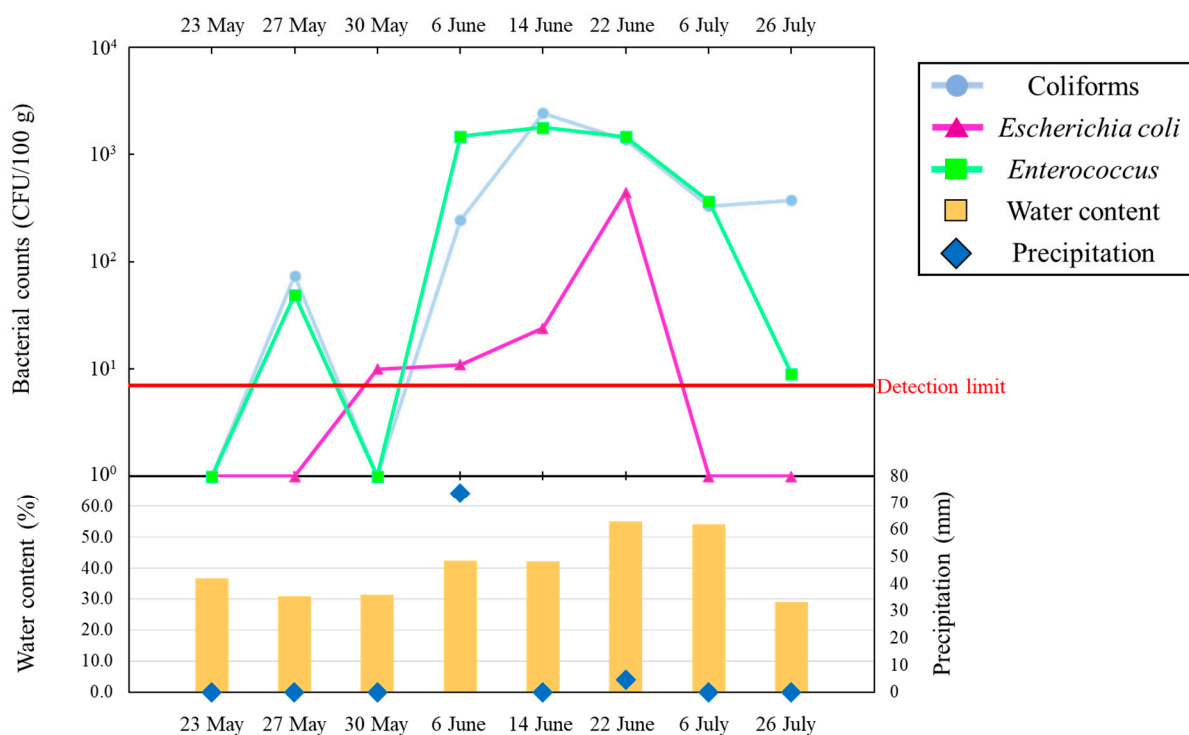

Figure S4. Variation of *Escherichia coli*, coliform, and *Enterococcus* counts in intertidal 10 cm sand; water content; and precipitation at Shirahama Beach.

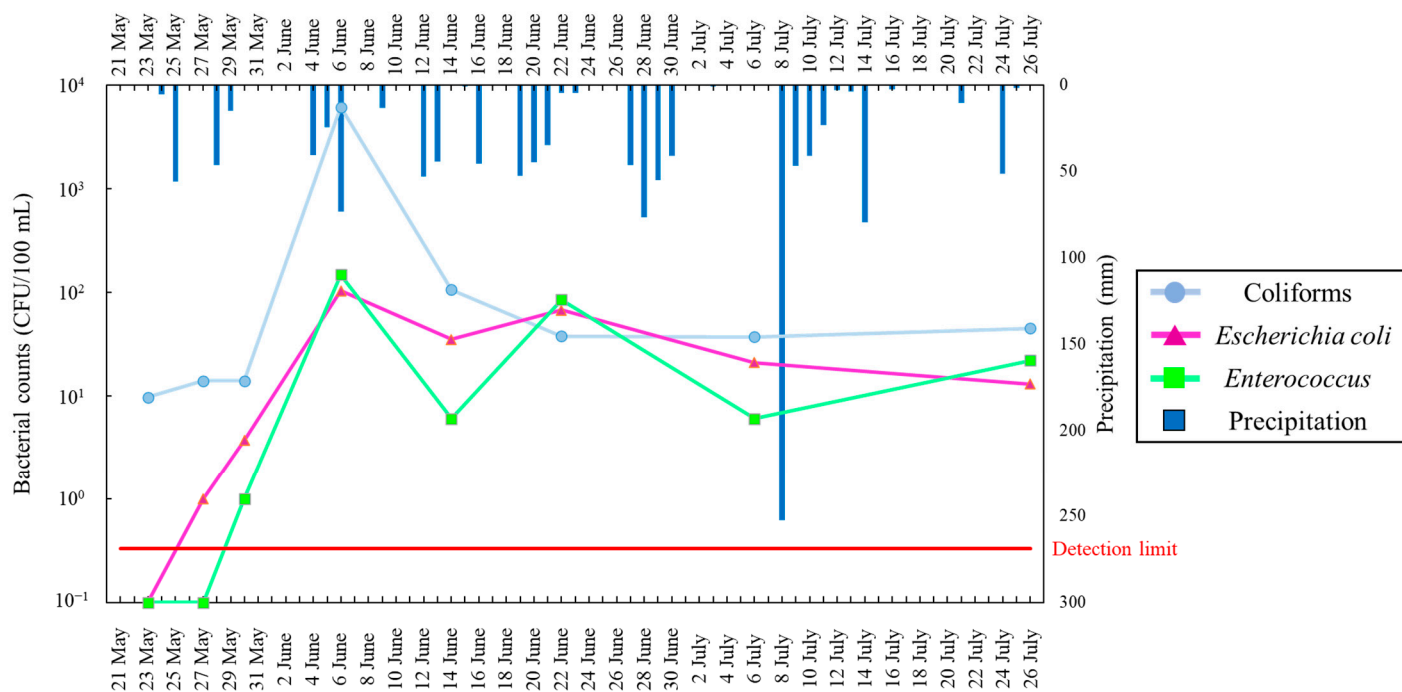

Figure S5. Variation of *Escherichia coli*, coliform, and *Enterococcus* counts in the seawater; precipitation at Kizaki Beach.

## Supplementary Figure and Table

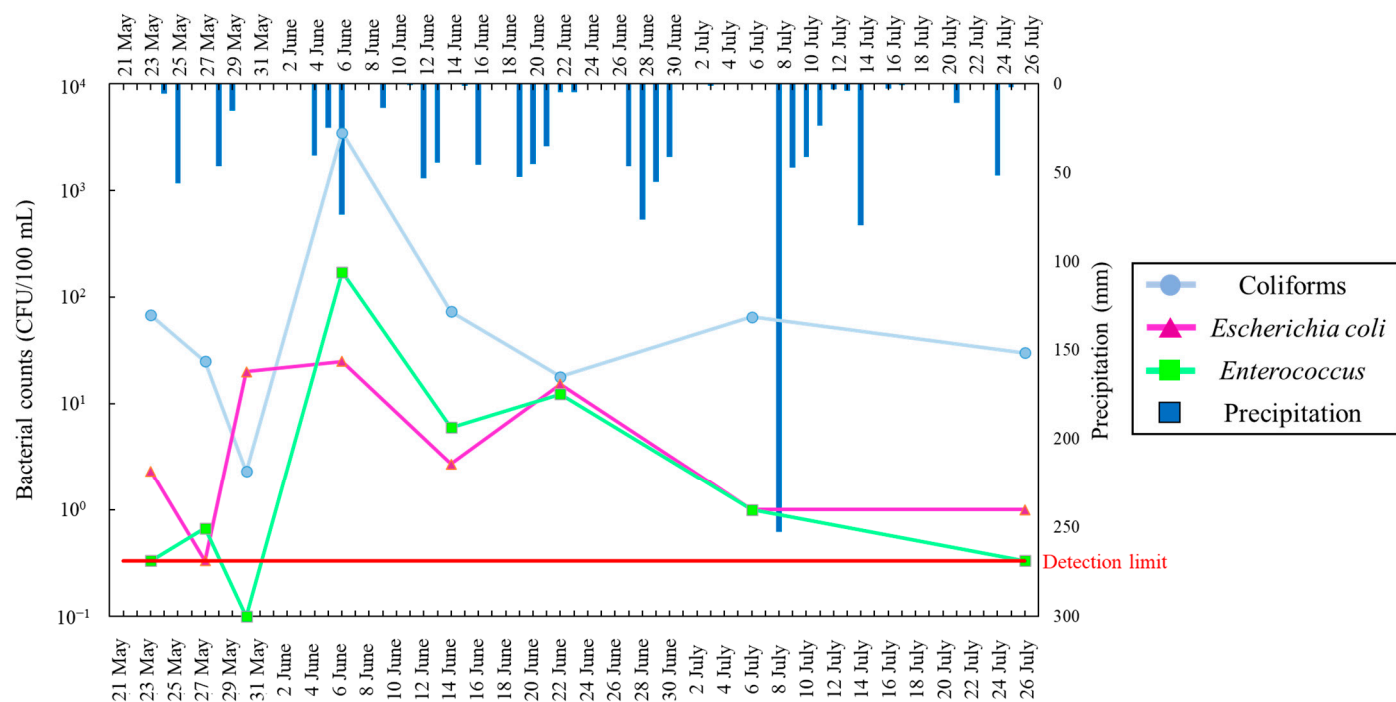

Figure S6. Variation of *Escherichia coli*, coliform, and *Enterococcus* counts in the seawater; precipitation at Shirahama Beach.

# Supplementary Figure and Table

Table S1. Sunshine duration, wind speed, and precipitation at a meteorological station (31°48'10.8"N 131°27'36.0"E) near the sampling site.

|        | Sunshine duration | Average wind speed | Maximum wind speed | Maximum instantaneous | Precipitation (mm) | Average temperature | Maximum temperature | Minimum temperature |
|--------|-------------------|--------------------|--------------------|-----------------------|--------------------|---------------------|---------------------|---------------------|
|        | (h)               | (m/s)              | (m/s)              | wind speed (m/s)      |                    | (°C)                | (°C)                | (°C)                |
| 23-May | 8.8               | 1.7                | 3.8                | 6.2                   | 0                  | 21.7                | 26.1                | 18.5                |
| 27-May | 2.9               | 1.3                | 3.3                | 6.7                   | 0                  | 24.4                | 28.1                | 21.5                |
| 30-May | 9.6               | 1.8                | 3.9                | 7.2                   | 0                  | 23.8                | 27.4                | 20.4                |
| 31-May | 11.9              | 1.6                | 4.3                | 8.2                   | 0                  | 24                  | 28.2                | 19.2                |
| 1-Jun  | 0                 | 1.3                | 2.6                | 5                     | 0                  | 21.4                | 23.3                | 18.5                |
| 2-Jun  | 11.9              | 2.1                | 4.3                | 8.8                   | 0                  | 20.9                | 24.8                | 17                  |
| 6-Jun  | 0                 | 2.6                | 5.4                | 11.2                  | 73.5               | 20.5                | 21.2                | 19.3                |
| 7-Jun  | 5.5               | 1.7                | 4.5                | 7.3                   | 0                  | 23.3                | 27.4                | 20.8                |
| 8-Jun  | 4.4               | 1.4                | 3                  | 4.5                   | 0                  | 23.9                | 26.8                | 21.7                |
| 9-Jun  | 4.6               | 1.3                | 3.3                | 5.3                   | 13.5               | 23                  | 26.2                | 20.9                |
| 10-Jun | 9.3               | 1.6                | 4.4                | 6.8                   | 0                  | 23.6                | 27                  | 20.3                |
| 11-Jun | 1.6               | 1.4                | 3.4                | 5.7                   | 0.5                | 24.6                | 28.1                | 21.9                |
| 12-Jun | 0                 | 1.2                | 3.8                | 8                     | 53                 | 23.6                | 25.1                | 22.6                |
| 13-Jun | 0                 | 0.9                | 2.9                | 4.4                   | 44.5               | 23                  | 23.9                | 21.1                |
| 14-Jun | 10.2              | 1.4                | 3.7                | 7.3                   | 0                  | 24.2                | 28.9                | 20.2                |
| 15-Jun | 5.4               | 1.5                | 3.7                | 7.9                   | 1                  | 24.6                | 28.8                | 21                  |
| 16-Jun | 0                 | 1.7                | 5.6                | 11                    | 45.5               | 24.6                | 28.1                | 23                  |
| 17-Jun | 0                 | 1.3                | 4.6                | 11.9                  | 0                  | 23.1                | 26.3                | 20.5                |
| 20-Jun | 0                 | 1.4                | 4.3                | 9.5                   | 45                 | 24.5                | 28.5                | 23                  |
| 21-Jun | 3.3               | 1.3                | 4.3                | 8.5                   | 35                 | 26.8                | 32                  | 24.3                |
| 22-Jun | 1.7               | 1.2                | 3.6                | 8.1                   | 4.5                | 26.5                | 31.5                | 23.7                |
| 23-Jun | 9.9               | 2.3                | 5.1                | 11.7                  | 4.5                | 29.2                | 33.9                | 25.4                |
| 24-Jun | 3.6               | 1.9                | 5.1                | 10.5                  | 0                  | 29.5                | 32.9                | 24.7                |
| 25-Jun | 2.1               | 2.8                | 6.1                | 13.6                  | 0                  | 25.8                | 30.5                | 20.1                |
| 26-Jun | 12.7              | 2.5                | 5.7                | 11                    | 0                  | 25                  | 31.4                | 19.6                |
| 27-Jun | 1                 | 1.1                | 2.8                | 4.9                   | 46.5               | 19.5                | 22.7                | 18.2                |
| 28-Jun | 0                 | 1.2                | 3.7                | 7.1                   | 76.5               | 24.4                | 27.3                | 19.4                |
| 29-Jun | 0.1               | 1.1                | 3.8                | 8.3                   | 55                 | 24.6                | 27.3                | 22.8                |
| 30-Jun | 0.9               | 0.9                | 3.3                | 6.3                   | 41                 | 23.2                | 26.5                | 21.1                |
| 1-Jul  | 4.8               | 1.3                | 3.4                | 7                     | 0                  | 25.5                | 31.2                | 20.9                |
| 2-Jul  | 9.4               | 1.4                | 3.1                | 6.8                   | 0                  | 28.3                | 33.7                | 22.8                |
| 3-Jul  | 10.1              | 1.4                | 3.5                | 7.7                   | 1                  | 29.4                | 34.9                | 25.4                |
| 4-Jul  | 7.7               | 1.2                | 3.4                | 6.3                   | 0                  | 28.1                | 33.1                | 24                  |
| 5-Jul  | 12.3              | 1.6                | 4.1                | 8.8                   | 0                  | 28                  | 32.6                | 23.9                |
| 6-Jul  | 13.7              | 1.7                | 4                  | 7.1                   | 0                  | 27                  | 31.3                | 23.3                |
| 10-Jul | 0.8               | 0.8                | 3                  | 7.1                   | 41                 | 25.4                | 27.9                | 24.3                |

# Supplementary Figure and Table

|        |      |     |     |      |      |      |      |      |
|--------|------|-----|-----|------|------|------|------|------|
| 12-Jul | 8.8  | 1.4 | 3.8 | 10.6 | 3    | 28.7 | 34.8 | 25.2 |
| 14-Jul | 2.7  | 1.5 | 4.4 | 10.3 | 79.5 | 27.1 | 31.7 | 24.3 |
| 15-Jul | 10.4 | 1.8 | 4.5 | 8.3  | 0    | 26.1 | 29.6 | 21.4 |
| 26-Jul | 10.7 | 1.6 | 4.3 | 7.5  | 0    | 26.7 | 30.2 | 23.8 |

Table S2. Bacterial counts, water content and surface temperature in supratidal top surface sand; precipitation at Kizaki Beach.

|        | Total Coliform (CFU/100g) | <i>Escherichia coli</i> (CFU/100g) | <i>Enterococcus</i> (CFU/100g) | Water content (%) | Temperature (°C) |
|--------|---------------------------|------------------------------------|--------------------------------|-------------------|------------------|
| 23-May | 439                       | 0                                  | 0                              | 0.5               | 47.6             |
| 27-May | 0                         | 0                                  | 0                              | 0.4               | 27.8             |
| 30-May | 15                        | 0                                  | 0                              | 0.6               | 36               |
| 31-May | 56                        | 0                                  | 0                              | 0.5               | 45.3             |
| 1-Jun  | 453                       | 0                                  | 121                            | 2.7               | 23.9             |
| 2-Jun  | 35                        | 0                                  | 20                             | 0.2               | 40.5             |
| 6-Jun  | 749                       | 24                                 | 330                            | 13.2              | 22               |
| 7-Jun  | 1629                      | 65                                 | 109                            | 5.6               | 30.2             |
| 8-Jun  | 90                        | 0                                  | 0                              | 0.1               | 35.2             |
| 9-Jun  | 47                        | 7                                  | 117                            | 1.1               | 39.4             |
| 10-Jun | 20                        | 0                                  | 14                             | 0.5               | 45.8             |
| 11-Jun | 62                        | 0                                  | 0                              | 0.2               | 41               |
| 12-Jun | 1010                      | 0                                  | 740                            | 13.3              | 26.2             |
| 13-Jun | 3524                      | 8                                  | 91                             | 9.7               | 26.6             |
| 14-Jun | 1243                      | 0                                  | 0                              | 0.3               | 43.5             |
| 15-Jun | 26                        | 0                                  | 0                              | 0.4               | 42.1             |
| 16-Jun | 1486                      | 147                                | 116                            | 11.6              | 24.1             |
| 17-Jun | 2226                      | 0                                  | 92                             | 4.0               | 24.3             |
| 20-Jun | 686                       | 0                                  | 129                            | 10.1              | 25.1             |
| 21-Jun | 4420                      | 289                                | 171                            | 6.0               | 30.6             |
| 22-Jun | 1955                      | 8                                  | 65                             | 5.0               | 28.5             |
| 23-Jun | 79                        | 0                                  | 0                              | 0.3               | 44.1             |
| 24-Jun | 8                         | 0                                  | 0                              | 0.2               | 41.5             |
| 25-Jun | 21                        | 0                                  | 7                              | 0.2               | 36.1             |
| 26-Jun | 39                        | 0                                  | 7                              | 0.1               | 51               |
| 27-Jun | 94                        | 0                                  | 7                              | 12.4              | 23.2             |
| 28-Jun | 927                       | 8                                  | 306                            | 8.5               | 27.6             |
| 29-Jun | 3732                      | 15                                 | 103                            | 7.0               | 31.3             |
| 30-Jun | 3983                      | 0                                  | 394                            | 9.5               | 24.8             |
| 1-Jul  | 1913                      | 0                                  | 0                              | 0.4               | 41               |

## Supplementary Figure and Table

|        |      |    |      |     |      |
|--------|------|----|------|-----|------|
| 2-Jul  | 23   | 0  | 0    | 0.2 | 41.5 |
| 3-Jul  | 643  | 0  | 20   | 0.4 | 39.6 |
| 4-Jul  | 21   | 0  | 7    | 0.4 | 54   |
| 5-Jul  | 7    | 0  | 0    | 0.1 | 51.5 |
| 6-Jul  | 34   | 0  | 0    | 0.1 | 50.5 |
| 10-Jul | 2342 | 53 | 13   | 6.7 | 36.4 |
| 12-Jul | 76   | 0  | 0    | 0.9 | 42.5 |
| 14-Jul | 4698 | 0  | 1064 | 2.9 | 29.4 |
| 15-Jul | 35   | 0  | 0    | 0.2 | 52   |
| 26-Jul | 21   | 0  | 0    | 0.1 | 47.4 |

# Supplementary Figure and Table

Table S3. Bacterial counts, water content and surface temperature in supratidal top surface sand; precipitation at Shirahama Beach.

|        | Total Coliform (cfu/100g) | <i>Escherichia coli</i> (cfu/100g) | <i>Enterococcus</i> (cfu/100g) | Water content (%) | Temperature (°C) |
|--------|---------------------------|------------------------------------|--------------------------------|-------------------|------------------|
| 23-May | 1050                      | 0                                  | 0                              | 0.7               | 47.5             |
| 27-May | 4279                      | 0                                  | 0                              | 9.8               | 24.2             |
| 30-May | 246                       | 480                                | 49                             | 18.2              | 32.5             |
| 31-May | 643                       | 0                                  | 0                              | 8.4               | 32.5             |
| 1-Jun  | 312                       | 0                                  | 124                            | 3.6               | 23.3             |
| 2-Jun  | 28                        | 0                                  | 0                              | 0.6               | 35.8             |
| 6-Jun  | 189                       | 8                                  | 991                            | 20.1              | 22               |
| 7-Jun  | 435                       | 151                                | 1300                           | 12.6              | 30.1             |
| 8-Jun  | 121                       | 0                                  | 7                              | 2.3               | 32.5             |
| 9-Jun  | 699                       | 1536                               | 2844                           | 11.9              | 33.2             |
| 10-Jun | 25                        | 246                                | 590                            | 2.1               | 37.6             |
| 11-Jun | 57                        | 0                                  | 7                              | 1.1               | 35               |
| 12-Jun | 818                       | 364                                | 566                            | 13.6              | 27.2             |
| 13-Jun | 3205                      | 450                                | 132                            | 14.5              | 25.5             |
| 14-Jun | 715                       | 8                                  | 44                             | 8.6               | 35               |
| 15-Jun | 115                       | 0                                  | 0                              | 0.7               | 41.5             |
| 16-Jun | 325                       | 914                                | 515                            | 17.5              | 25.4             |
| 17-Jun | 4911                      | 31                                 | 74                             | 11.6              | 25.1             |
| 20-Jun | 4933                      | 26                                 | 15                             | 15.3              | 24.7             |
| 21-Jun | 1948                      | 199                                | 141                            | 11.5              | 32               |
| 22-Jun | 1123                      | 16                                 | 1882                           | 12.4              | 29.2             |
| 23-Jun | 2118                      | 9                                  | 15                             | 11.8              | 33.1             |
| 24-Jun | 107                       | 0                                  | 0                              | 1.4               | 37.7             |
| 25-Jun | 251                       | 0                                  | 0                              | 0.5               | 37.6             |
| 26-Jun | 83                        | 0                                  | 0                              | 0.6               | 43.4             |
| 27-Jun | 415                       | 0                                  | 547                            | 15.5              | 22.1             |
| 28-Jun | 5521                      | 0                                  | 15                             | 11.3              | 25.8             |
| 29-Jun | 852                       | 0                                  | 121                            | 10                | 29.8             |
| 30-Jun | 3194                      | 33                                 | 77                             | 14                | 24.7             |
| 1-Jul  | 1570                      | 8                                  | 65                             | 8.6               | 32.7             |
| 2-Jul  | 536                       | 0                                  | 0                              | 0.9               | 36.3             |
| 3-Jul  | 7280                      | 375                                | 3075                           | 7.1               | 34.4             |
| 4-Jul  | 86                        | 0                                  | 19                             | 0.4               | 43.1             |
| 5-Jul  | 20                        | 0                                  | 0                              | 0.3               | 46               |
| 6-Jul  | 55                        | 0                                  | 13                             | 0.3               | 33.1             |
| 10-Jul | 785                       | 19                                 | 359                            | 20                | 34               |



## Supplementary Figure and Table

|        |      |    |      |     |      |
|--------|------|----|------|-----|------|
| 12-Jul | 3596 | 12 | 780  | 6.4 | 36.2 |
| 14-Jul | 3448 | 0  | 64   | 9   | 31.7 |
| 15-Jul | 541  | 0  | 0    | 0.7 | 42.2 |
| 26-Jul | 351  | 0  | 1492 | 6.2 | 37.5 |

---

# Supplementary Figure and Table

Table S4. Composition of coliforms in supratidal top surface sand at Kizaki Beach.

|                      | 31-<br>May | 1-<br>Jun | 2-<br>Jun | 7-<br>Jun | 8-<br>Jun | 9-<br>Jun | 10-<br>Jun | 11-<br>Jun | 12-<br>Jun | 13-<br>Jun | 15-<br>Jun | 16-<br>Jun | 17-<br>Jun | 20-<br>Jun | 21-<br>Jun | 23-<br>Jun | 24-<br>Jun | 25-<br>Jun | 26-<br>Jun | 27-<br>Jun | 28-<br>Jun | 29-<br>Jun | 30-<br>Jun | 1-Jul 2-Jul 3-Jul 4-Jul 5-Jul |   |    |   |    | 10-<br>Jul | 12-<br>Jul | 14-<br>Jul | 15-<br>Jul |
|----------------------|------------|-----------|-----------|-----------|-----------|-----------|------------|------------|------------|------------|------------|------------|------------|------------|------------|------------|------------|------------|------------|------------|------------|------------|------------|-------------------------------|---|----|---|----|------------|------------|------------|------------|
| <i>Acinetobacter</i> |            |           |           |           |           |           |            |            |            |            |            |            |            |            | 1          | 1          |            |            | 1          |            | 1          |            |            |                               |   |    |   |    |            |            |            |            |
| <i>Aeromonas</i>     |            |           |           |           |           |           |            |            | 1          |            |            |            |            |            |            |            |            |            |            |            |            |            |            |                               |   |    |   |    |            |            |            |            |
| <i>Cedecea</i>       |            |           |           |           |           |           |            |            |            |            |            |            |            |            |            |            |            |            |            |            | 1          |            |            |                               |   |    |   |    | 1          |            |            |            |
| <i>Citrobacter</i>   | 1          |           |           |           |           |           |            |            | 3          | 1          | 1          |            |            | 18         |            |            |            |            |            |            |            |            | 20         |                               |   | 1  |   | 3  |            | 1          |            |            |
| <i>Cronobacter</i>   |            |           |           | 1         |           |           |            | 2          |            |            |            | 1          |            | 1          |            |            |            |            |            |            | 1          |            | 2          |                               |   |    |   | 2  |            |            |            |            |
| <i>Cupriavidus</i>   |            |           |           |           |           |           |            |            |            |            |            |            |            |            |            |            |            |            |            |            |            |            |            |                               |   |    |   |    | 2          |            |            |            |
| <i>Delftia</i>       |            |           |           |           |           |           |            |            |            |            |            |            |            |            |            |            |            |            |            |            |            |            | 1          |                               |   |    |   |    |            |            |            |            |
| <i>Enterobacter</i>  | 10         |           |           | 10        |           |           |            |            | 5          | 19         |            | 5          | 15         | 2          | 13         | 2          |            | 1          | 3          | 3          | 18         | 29         | 3          | 30                            | 3 | 26 |   | 16 | 10         | 26         | 3          |            |
| <i>Escherichia</i>   |            |           |           | 3         |           |           |            |            |            |            |            |            |            |            |            |            |            |            |            | 1          |            |            |            |                               |   |    |   |    |            |            |            |            |
| <i>Klebsiella</i>    |            |           |           |           |           |           |            |            |            |            |            | 9          |            | 2          |            |            |            |            |            |            |            |            |            |                               |   |    |   | 1  |            |            |            |            |
| <i>Kluyvera</i>      |            |           |           | 1         |           |           |            | 2          |            |            |            |            |            |            |            |            |            |            |            |            |            |            | 1          |                               |   |    |   |    |            |            |            |            |
| <i>Kosakonia</i>     |            |           |           | 7         |           |           |            |            |            |            |            |            |            |            |            |            |            |            |            |            | 2          |            |            |                               |   |    |   |    |            |            |            |            |
| <i>Leclercia</i>     | 2          |           |           | 2         | 12        |           | 2          | 7          | 8          | 6          | 1          | 20         | 4          | 2          |            | 1          | 1          | 2          |            | 2          | 2          | 1          | 1          |                               |   | 1  | 1 | 2  |            | 1          | 3          |            |
| <i>Lelliottia</i>    | 1          | 27        |           |           |           |           |            |            |            |            |            |            |            |            | 13         | 2          |            |            |            |            |            |            |            |                               | 1 |    |   |    |            |            |            |            |
| <i>Mycoplasma</i>    |            |           |           |           |           |           |            |            |            |            |            |            |            |            |            |            |            |            |            |            |            |            |            |                               |   |    |   |    | 1          |            |            |            |
| <i>Ochrobactrum</i>  |            |           |           |           |           |           |            |            |            |            |            |            |            |            | 1          |            |            |            |            |            |            |            |            |                               | 1 |    |   |    |            |            |            |            |
| <i>Paenibacillus</i> |            |           |           |           |           |           |            |            |            |            |            |            |            |            |            |            |            |            | 1          |            |            |            |            |                               |   |    |   |    | 2          |            |            |            |
| <i>Pantoea</i>       | 4          | 2         | 5         |           | 1         |           |            |            | 5          | 2          | 1          | 1          | 1          |            |            |            |            |            |            | 8          | 3          |            |            | 1                             |   |    | 1 | 7  |            |            |            |            |
| <i>Providencia</i>   |            |           |           | 1         |           |           |            |            |            |            |            |            |            | 4          |            |            |            |            |            |            |            |            |            |                               |   |    |   |    |            |            |            |            |
| <i>Pseudomonas</i>   |            |           |           |           |           |           |            |            | 1          |            |            | 1          |            |            |            | 1          |            |            |            |            |            |            |            |                               |   |    |   |    |            | 1          |            |            |
| <i>Raoultella</i>    |            |           |           |           |           |           |            |            |            |            |            |            | 1          |            |            |            |            |            |            |            |            |            |            |                               |   |    |   | 1  |            |            |            |            |
| <i>Serratia</i>      |            |           |           | 5         |           |           |            |            | 4          |            |            |            |            |            |            |            |            |            |            |            |            |            |            |                               |   |    |   | 3  |            |            |            |            |

## Supplementary Figure and Table

Table S5. Composition of coliforms in supratidal top surface sand at Shirahama Beach.

[illegible]

## Supplementary Figure and Table

Table S6. List of the major pathogenic bacteria of the bacterial genus isolated from the two beaches and the diseases they cause. Only major bacterial genera present at >5.0% of the relative abundance are shown.

| Genus               | Major pathogenic bacteria (species)   | Lists of diseases                                                                                                                                                                                                                                                           | Reference |
|---------------------|---------------------------------------|-----------------------------------------------------------------------------------------------------------------------------------------------------------------------------------------------------------------------------------------------------------------------------|-----------|
| <i>Enterobacter</i> | <i>Enterobacter cloacae</i>           | Urinary tract infections, Respiratory infections, Soft tissue infections, Osteomyelitis, and Endocarditis.                                                                                                                                                                  | 27        |
|                     | <i>Enterobacter hormaechei</i>        |                                                                                                                                                                                                                                                                             |           |
|                     | <i>Enterobacter agglomerans</i>       |                                                                                                                                                                                                                                                                             |           |
| <i>Leclercia</i>    | <i>Leclercia adecarboxylata</i>       | Endocarditis, Bacteremia, Cellulitis, Urinary tract infections, Pneumonia, and Bacterial peritonitis.                                                                                                                                                                       | 28        |
| <i>Citrobacter</i>  | <i>Citrobacter freundii</i>           | Urinary tract infections, Intra-abdominal infections, surgical site infections, skin and soft tissue infections, and respiratory tract infections.                                                                                                                          | 29        |
|                     | <i>Citrobacter koseri</i>             |                                                                                                                                                                                                                                                                             |           |
|                     | <i>Citrobacter braakii</i>            |                                                                                                                                                                                                                                                                             |           |
| <i>Lelliottia</i>   | <i>Lelliottia nimipressuralis</i>     | Skin and soft tissue infection.                                                                                                                                                                                                                                             | 30        |
| <i>Pantoea</i>      | <i>Pantoea agglomerans</i>            | Neonatal infection, Wound infections, Synovitis, Septic arthritis, Osteomyelitis, Bloodstream infections, Peritonitis, Cholelithiasis, Endophthalmitis, Endocarditis, Dacryocystitis, Urinary tract infection, Meningitis, Brain abscess, and Respiratory tract infections. | 31        |
|                     | <i>Pantoea dispersa</i>               |                                                                                                                                                                                                                                                                             |           |
| <i>Klebsiella</i>   | <i>Klebsiella pneumoniae</i>          | Urinary tract infections, Pneumonia, Septicemia, Wound infections, Nosocomial infections in intensive care unit patients, and Neonatal septicemia                                                                                                                           | 32        |
|                     | <i>Klebsiella ozaenae</i>             |                                                                                                                                                                                                                                                                             |           |
|                     | <i>Klebsiella rhinoscleromatis</i>    |                                                                                                                                                                                                                                                                             |           |
| <i>Escherichia</i>  | <i>Diarrheagenic Escherichia coli</i> | Traveler's diarrhea, hemorrhagic colitis and hemolytic-uremic syndrome, persistent diarrhea, and watery diarrhea of infants.                                                                                                                                                | 33        |

Table S7. Results of the logistic regression model for the proportion of *Enterobacter*.

|                    | Kisaki Beach |       | Shira Beach |       |
|--------------------|--------------|-------|-------------|-------|
|                    | Coefficient  | p> z  | Coefficient | p> z  |
| Water content rate | -0.0287      | 0.837 | 0.0713      | 0.438 |
| Temperature        | -0.0172      | 0.792 | -0.0515     | 0.571 |
| Constant           | 0.1787       | 0.949 | 0.6179      | 0.861 |
| Observations       | 31           |       | 32          |       |
| Log likelihood     | -16.733      |       | -15.718     |       |
